# Supplementary material for: In Silico Identification of SOX1 Post-Translational Modifications Highlights a Shared Protein Motif
Source: PubMed Central journal article supplement (PMC7696889; doi:10.3390/cells9112471), 2020-11-13
Supplement: cells-09-02471-s001.pdf [file cells-09-02471-s001.pdf]

Figure S1

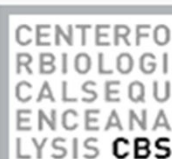

## NetPhos 3.1 Server - prediction results

Technical University of Denmark

```
>sp_000570_SOX1_HUMAN 391 amino acids
#
# netphos-3.1b prediction results
#
# Sequence # x Context Score Kinase Answer
# -----
# sp_000570_SOX1_HUMAN 12 S TDLHSPGGA 0.963 unsp YES
# sp_000570_SOX1_HUMAN 20 T AQAPTNLGSG 0.529 cdc2 YES
# sp_000570_SOX1_HUMAN 93 S WKVMSEAEK 0.829 unsp YES
# sp_000570_SOX1_HUMAN 118 Y EHPDYKYRP 0.942 unsp YES
# sp_000570_SOX1_HUMAN 126 T PRRKTKTLL 0.961 unsp YES
# sp_000570_SOX1_HUMAN 128 T RKTLLK 0.877 PKC YES
# sp_000570_SOX1_HUMAN 135 Y KDKYSLAG 0.971 unsp YES
# sp_000570_SOX1_HUMAN 136 S KDKYSLAGG 0.798 PKA YES
# sp_000570_SOX1_HUMAN 172 S QRLESPGGA 0.996 unsp YES
# sp_000570_SOX1_HUMAN 181 Y AGGGYAHVN 0.791 unsp YES
# sp_000570_SOX1_HUMAN 249 Y PMHRYDMGA 0.530 unsp YES
# sp_000570_SOX1_HUMAN 257 S ALQYSPISN 0.722 unsp YES
# sp_000570_SOX1_HUMAN 260 S YSPISNSQG 0.560 cdc2 YES
# sp_000570_SOX1_HUMAN 262 S PISNSQGYM 0.633 DNAPK YES
# sp_000570_SOX1_HUMAN 265 Y NSQGYMSAS 0.731 unsp YES
# sp_000570_SOX1_HUMAN 267 S QGYMSASPS 0.889 unsp YES
# sp_000570_SOX1_HUMAN 269 S YMSASPSGY 0.848 unsp YES
# sp_000570_SOX1_HUMAN 271 S SASPSGYGG 0.950 unsp YES
# sp_000570_SOX1_HUMAN 273 Y SPSGYGGLP 0.606 unsp YES
# sp_000570_SOX1_HUMAN 316 S GALGSLVKS 0.742 PKC YES
# sp_000570_SOX1_HUMAN 320 S SLVKSEPSG 0.749 unsp YES
# sp_000570_SOX1_HUMAN 323 S KSEPSGSPP 0.788 unsp YES
# sp_000570_SOX1_HUMAN 325 S EPSGSPPAP 0.904 unsp YES
# sp_000570_SOX1_HUMAN 332 S APAHSRAPC 0.594 PKG YES
# sp_000570_SOX1_HUMAN 370 S SRLHSLPQH 0.822 unsp YES
# sp_000570_SOX1_HUMAN 385 T GVNGTVPLT 0.705 PKC YES
#
# MYSMMETDLHSPGGAQAAPTNLGSPAGAGGGGGGGGGGGGAKANQDR # 50
# VKRPMNAFMVWSRGQRRKMAQENPKMHNSEISKRLGAEWKVMSEAEKRPF # 100
# IDEAKRLRALHMKEHPDYKYRPRRKTLLKDKYSLAGLLAAGAGGGG # 150
# AAVAMGVGVGVGAAAVGQRLESPGGAAGGGYAHVNGWANGAYPGSVAAAA # 200
# AAAAMMQEAQLAYGQHPGAGGAHPAHAPHPHPHPHPHNPQPMHRYD # 250
# MGALQYSPISNSQGYMSASPSGYGGLPYGAAAAAAAAAAGGAHQNSAVAAA # 300
# AAAAAASSGALGALGSLVKSEPSGSPPAPAHSRAPCPGDLREMISMVLP # 350
# GEGGDPAAAAAAAAAQSRHSLPQHYQGAGAGVNGTVPLTHI # 400
%1 .....S.....T..... # 50
%1 .....S..... # 100
%1 .....Y.....T.T.....YS..... # 150
%1 .....S.....Y..... # 200
%1 .....Y..... # 250
%1 .....S..S.S..Y.S.S.S.Y..... # 300
%1 .....S...S..S.S.....S..... # 350
%1 .....S.....T.....
```

Figure S2

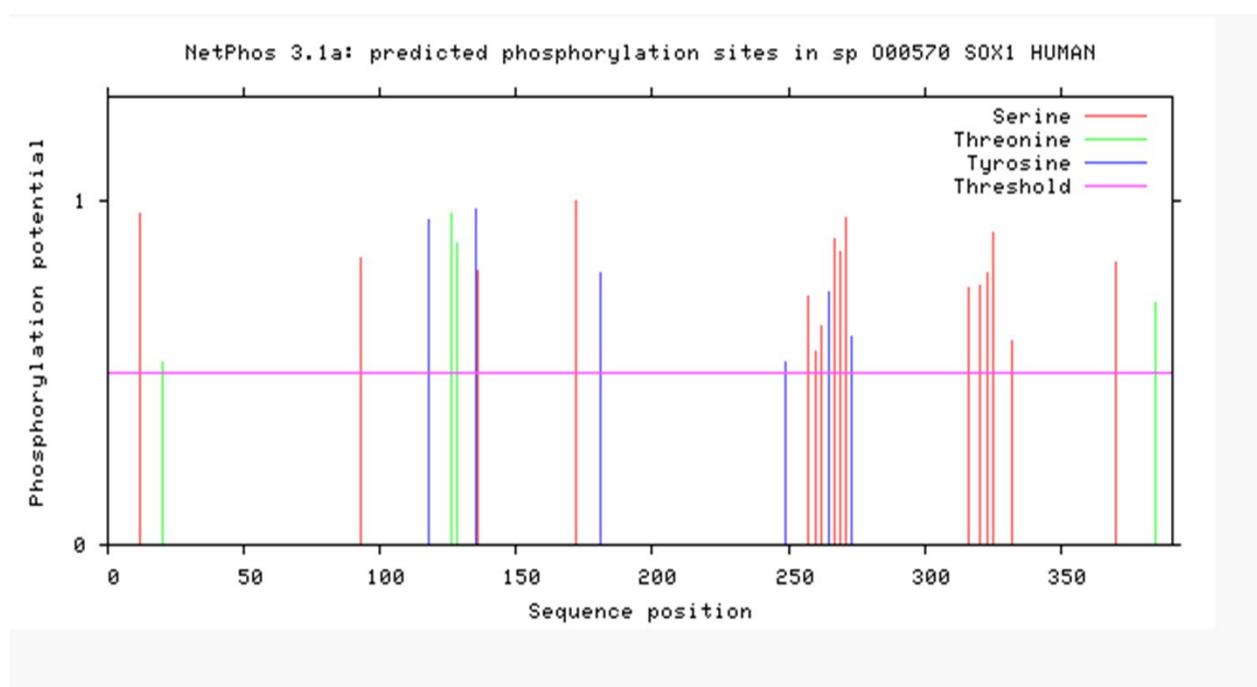

Figure S3

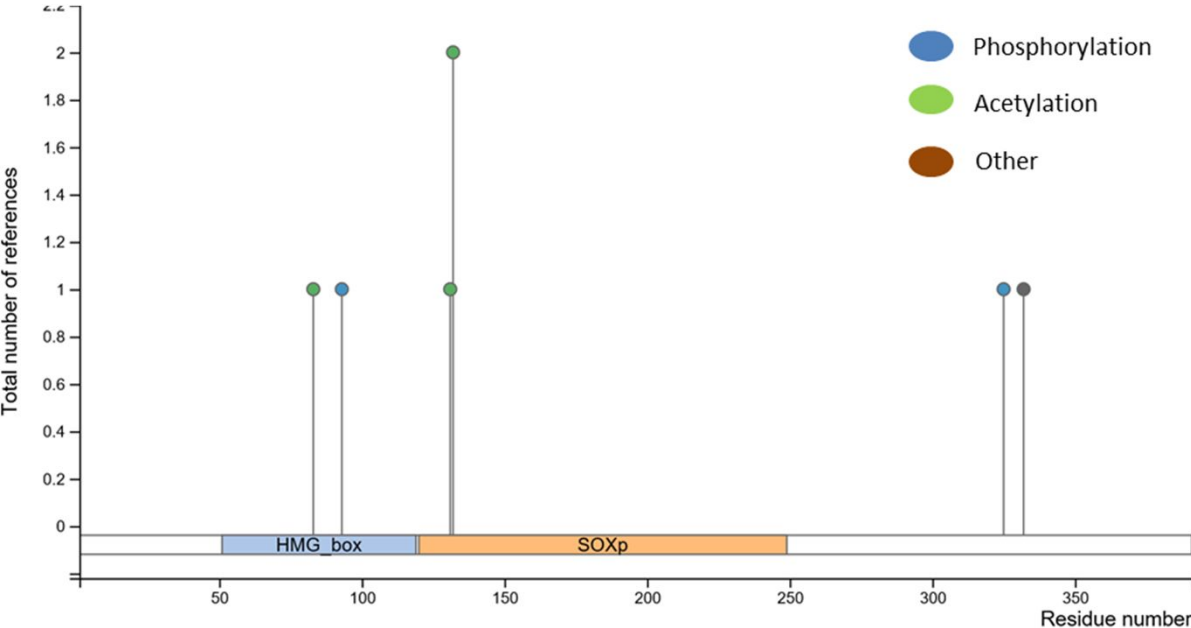

Figure S4

| Uniprot ID                                                                | Organism     | Amino acid start position |      | Amino acid end position                                       |      |
|---------------------------------------------------------------------------|--------------|---------------------------|------|---------------------------------------------------------------|------|
| <b>Chromodomain-helicase-DNA-binding protein 7 (CHD7)</b>                 |              |                           |      |                                                               |      |
| Q9P2D1                                                                    | CHD7_HUMAN   | Human                     | 2211 | ASSVKNELKGVVEVGADTGSKSISEKGSSEDEEEKLEDDDKSEESSQPEAGAVSRGKNFDE | 2270 |
| A2AJK6                                                                    | CHD7_MOUSE   | Mouse                     | 2200 | ASSVKGELKGVVEGSADPGSKSVSEKGSSEDEEEKLEDDDKSEESSQPEAGAVSRGKTFDE | 2259 |
| Q06A37                                                                    | CHD7_CHICK   | Opossum                   | 2213 | TGSVKCELKDIEMSTDVDPKSISEKGSSEDEEEKLEDDDKSEESSQPEAGAVSQGKNFDE  | 2272 |
| G3R983                                                                    | G3R983_GORGO | Gorilla                   | 2211 | ASSVKNELKGVVEVGADTGSKSISEKGSSEDEEEKLEDDDKSEESSQPEAGAVSRGKNFDE | 2270 |
| :.*** **.* : * . * :*****:*****:*.***                                     |              |                           |      |                                                               |      |
| <b>Erythroid membrane-associated protein (ERMAP)</b>                      |              |                           |      |                                                               |      |
| Q96PL5                                                                    | ERMAP_HUMAN  | Human                     | 387  | FSGPLRPFEPCLHDGGKNTAPLVICSELHKSEESIIVPRPEGKGHANGDVS LKVNSSLP  | 446  |
| Q9JLN5                                                                    | ERMAP_MOUSE  | Mouse                     | 478  | FSSPLRPFEPCLHDEGKNTAPLIICTELQKSEESIIVPKQEGKDRANGDVS LKMNPSLLS | 537  |
| F6X7V8                                                                    | F6X7V8_CANLF | Dog                       | 477  | FSGPLRPFEPCLHDGGKNTAPLIICSELQKSEPPTGPKPEEKVHANGDVAMTVDPSSLP   | 536  |
| G3QWV0                                                                    | G3QWV0_GORGO | Gorilla                   | 387  | FSGPLRPFEPCLHDGGKNTAPLVICSELHKSEESTVVPKPEGKGHANGDVS LKVNSSLP  | 446  |
| **.****** **.*:***:*** * : * * :*****:..: **                              |              |                           |      |                                                               |      |
| <b>Forkhead box protein D3 (FOXD3)</b>                                    |              |                           |      |                                                               |      |
| Q9UJU5                                                                    | FOXD3_HUMAN  | Human                     | 361  | AGTTASLIKSEPSARPSFSIENIIGGGPAAPGGSAVGAGVAG---GTGGSGGGSTAQSFL  | 417  |
| Q61060                                                                    | FOXD3_MOUSE  | Mouse                     | 346  | AGT-TSLIKSEPSARPSFSIENIIGAGSAAPGGSAAGGGGGGGGGGGGGGAQSFL       | 404  |
| P79772                                                                    | FOXD3_CHICK  | Chicken                   | 306  | ----GSIVKSEPSRPSFSIENIIGGPAAS-----SAPSAQTFL                   | 340  |
| H2R911                                                                    | H2R911_PANTR | Chimpanzee                | 361  | AGTTASLIKSEPSARPSFSIENIIGGGPAAPGGSAAGAGVAG---GTGGSGGGSTAQSFL  | 417  |
| *::*****:*****. * : .. **:**                                              |              |                           |      |                                                               |      |
| <b>N-myc proto-oncogene protein (MYCN)</b>                                |              |                           |      |                                                               |      |
| P04198                                                                    | MYCN_HUMAN   | Human                     | 339  | VESEDAPPQKKIKSEASPRPLKSVIPPKAKSLSPRNSDSEDSEERRRNHNILERQRRNDLR | 398  |
| P03966                                                                    | MYCN_MOUSE   | Mouse                     | 337  | VESEDAPPQKKIKSEASPRPLKSVVPAKAKSLSPRNSDSEDSEERRRNHNILERQRRNDLR | 396  |
| P18444                                                                    | MYCN_CHICK   | Chicken                   | 317  | MESEDVPPQKKLKAE-VPRPVKPMIQPKSKSSSPRNSDSEDSEERRRNHNILERQRRNDLR | 375  |
| G3QQZ3                                                                    | G3QQZ3_GORGO | Gorilla                   | 339  | MESEDAPPQKKIKSEASPRPLKSVIPPKAKSLSPRNSDSEDSEERRRNHNILERQRRNDLR | 398  |
| :****.******:*. * **:* : * : ** *****:*****                               |              |                           |      |                                                               |      |
| <b>Signal-induced proliferation-associated 1-like protein 2 (SIPA1L2)</b> |              |                           |      |                                                               |      |
| Q9P2F8                                                                    | SI1L2_HUMAN  | Human                     | 1380 | PGSMSKPYHRQGAVNKYVIGWKKSEGSPPPEEPEVTECPGMYSEMDVMSTATQHQTIVGD  | 1439 |
| Q80TE4                                                                    | SI1L2_MOUSE  | Mouse                     | 1380 | PGAVTKPYHRQGAANKYVIGWKKSEGSPPPEEPEVTECPRIYGEDMIMSTATQHPAVVGD  | 1439 |
| G3QET1                                                                    | G3QET1_GORGO | Gorilla                   | 1380 | PGSMSKPYHRQGAVNKYVIGWKKSEGSPPPEEPEVTECPGMYSEMDVMSTATQHQTIVGD  | 1439 |
| G1SZ09                                                                    | G1SZ09_RABIT | Rabbit                    | 1377 | PGSMSKPYHRQGAVNKYVIGWKKSEGSPPPEEPEVTECPGMYSEMDVMSAATQHQTIVGD  | 1436 |
| **:::*****.***** ** * :*.***:***:*** :****                                |              |                           |      |                                                               |      |

Figure S5

A

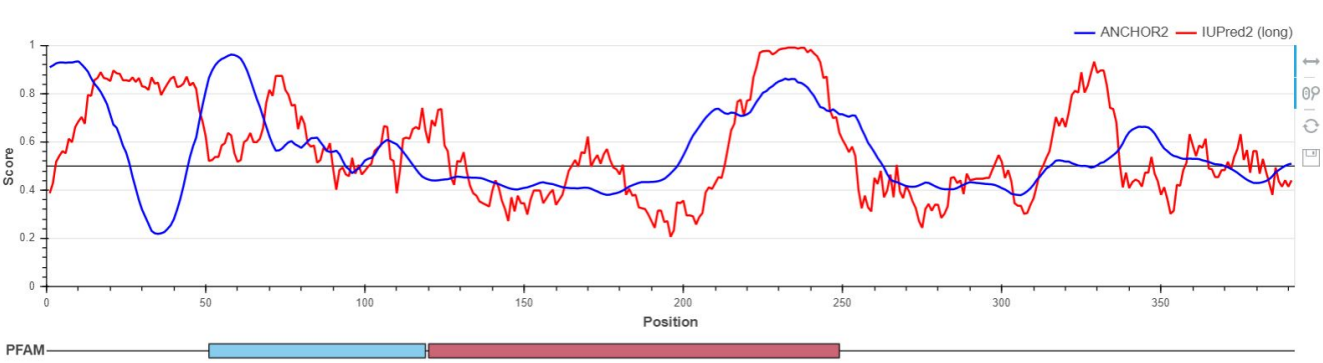

B

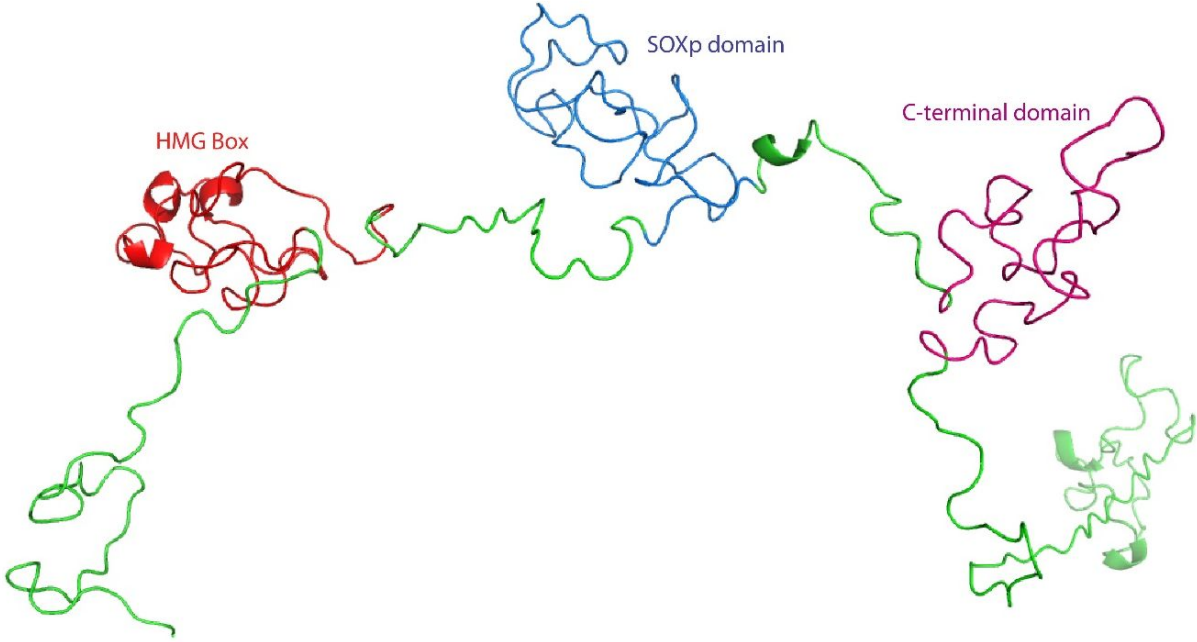

Table S1

| Elm Name        | Instances (Matched Sequence) | Positions          | Elm Description                             | Cell Compartment               | Pattern            | Probability |
|-----------------|------------------------------|--------------------|---------------------------------------------|--------------------------------|--------------------|-------------|
| MOD_CK1_1       | SEPSGSP                      | 3-9 [A]            | CK1 phosphorylation site                    | cytosol, nucleus               | S..([ST])...       | 1.704e-02   |
| MOD_GlcNHglycan | EPSGS<br>PSGS                | 4-8 [A]<br>5-8 [A] | Glycosaminoglycan attachment site           | extracellular, Golgi apparatus | [ED]{0,3}.(S)[GA]. | 1.792e-02   |
| MOD_SUMO_for_1  | VKSE                         | 1-4 [A]            | Motif recognised for modification by SUMO-1 | nucleus, PML body              | [VILMAFP](K).E     | 1.914e-03   |

Table S2

| Protein Identified        | Start | End  | Motif     |
|---------------------------|-------|------|-----------|
| 1. sp P42684 ABL2_HUMAN   | 835   | 843  | kKSEeSaaP |
| 2. sp O96019 ACL6A_HUMAN  | 111   | 119  | vKSEaSlhP |
| 3. sp Q8N7Z5 ANR31_HUMAN  | 44    | 52   | IKSEfSlhP |
| 4. sp Q9NR48 ASH1L_HUMAN  | 2842  | 2850 | wKSErSkpP |
| 5. sp Q9P2D1 CHD7_HUMAN   | 2249  | 2257 | dKSEeSsqP |
| 6. sp Q8WTW3 COG1_HUMAN   | 634   | 642  | gKSEsSekP |
| 7. sp Q96PL5 ERMAP_HUMAN  | 416   | 424  | hKSEeSivP |
| 8. sp Q96PV7 F193B_HUMAN  | 725   | 733  | kKSEaSpaP |
| 9. sp Q9UJU5 FOXD3_HUMAN  | 368   | 376  | iKSEpSarP |
| 10. sp P20810 ICAL_HUMAN  | 636   | 644  | kKSEdSkkP |
| 11. sp O95461 LARG1_HUMAN | 204   | 212  | IKSEvSwiP |
| 12. sp Q5JXC2 MIIP_HUMAN  | 325   | 333  | pKSEkSsaP |
| 13. sp P04198 MYCN_HUMAN  | 350   | 358  | iKSEaSprP |
| 14. sp P20929 NEBU_HUMAN  | 6551  | 6559 | eKSEhSeaP |
| 15. sp P46087 NOP2_HUMAN  | 614   | 622  | pKSEnSsqP |
| 16. sp Q14207 NPAT_HUMAN  | 654   | 662  | sKSEnSqeP |
| 17. sp Q86W56 PARG_HUMAN  | 649   | 657  | mKSEySsyP |
| 18. sp Q684P5 RPGP2_HUMAN | 603   | 611  | iKSEtSsnP |
| 19. sp Q5TZJ5 S31A1_HUMAN | 1108  | 1116 | hKSEkSrKp |
| 20. sp Q5VU36 S31A5_HUMAN | 1108  | 1116 | hKSEkSrKp |
| 21. sp Q5VVP1 S31A6_HUMAN | 1104  | 1112 | hKSEkSrKp |
| 22. sp Q8IWB4 S31A7_HUMAN | 1108  | 1116 | hKSEkSrKp |
| 23. sp Q9P2F8 SI1L2_HUMAN | 1401  | 1409 | kKSEgSppP |
| 24. sp O00570 SOX1_HUMAN  | 318   | 326  | vKSEpSgsP |
| 25. sp P48431 SOX2_HUMAN  | 244   | 252  | vKSEaSssP |
| 26. sp P41225 SOX3_HUMAN  | 374   | 382  | vKSEpSspP |
| 27. sp Q5TCZ1 SPD2A_HUMAN | 795   | 803  | sKSEdSelP |
| 28. sp P49750 YLPM1_HUMAN | 910   | 918  | pKSEvSegP |
| 29. sp P15822 ZEP1_HUMAN  | 123   | 131  | sKSEeSvsP |
| 30. sp Q9UL58 ZN215_HUMAN | 445   | 453  | sKSEdSnnP |
| 31. sp Q9NYT6 ZN226_HUMAN | 218   | 226  | hKSEkSyrP |
| 32. sp Q5VUA4 ZN318_HUMAN | 1429  | 1437 | eKSEpShIP |

Table S3

| Entry  | Entry name  | Protein names                                                                                                                                                                                                                                                                                                         | Gene names                                        | Length |
|--------|-------------|-----------------------------------------------------------------------------------------------------------------------------------------------------------------------------------------------------------------------------------------------------------------------------------------------------------------------|---------------------------------------------------|--------|
| Q96PL5 | ERMAP_HUMAN | Erythroid membrane-associated protein (hERMAP) (Radin blood group antigen) (Scianna blood group antigen)                                                                                                                                                                                                              | ERMAP RD SC                                       | 475    |
| P48431 | SOX2_HUMAN  | Transcription factor SOX-2                                                                                                                                                                                                                                                                                            | SOX2                                              | 317    |
| Q8WTW3 | COG1_HUMAN  | Conserved oligomeric Golgi complex subunit 1 (COG complex subunit 1) (Component of oligomeric Golgi complex 1)                                                                                                                                                                                                        | COG1 KIAA1381 LDLB                                | 980    |
| Q5VU36 | S31A5_HUMAN | Spermatogenesis-associated protein 31A5 (Protein FAM75A5)                                                                                                                                                                                                                                                             | SPATA31A5 FAM75A5                                 | 1347   |
| P04198 | MYCN_HUMAN  | N-myc proto-oncogene protein (Class E basic helix-loop-helix protein 37) (bHLHe37)                                                                                                                                                                                                                                    | MYCN BHLHE37 NMYC                                 | 464    |
| Q5TZJ5 | S31A1_HUMAN | Spermatogenesis-associated protein 31A1 (Protein FAM75A1)                                                                                                                                                                                                                                                             | SPATA31A1 C9orf36<br>FAM75A1 FAM75A2<br>SPATA31A2 | 1347   |
| Q9NYT6 | ZN226_HUMAN | Zinc finger protein 226                                                                                                                                                                                                                                                                                               | ZNF226                                            | 803    |
| Q5VVP1 | S31A6_HUMAN | Spermatogenesis-associated protein 31A6 (Protein FAM75A6)                                                                                                                                                                                                                                                             | SPATA31A6 FAM75A6                                 | 1343   |
| Q9UL58 | ZN215_HUMAN | Zinc finger protein 215 (BWSCR2-associated zinc finger protein 2) (BAZ-2) (Zinc finger protein with KRAB and SCAN domains 11)                                                                                                                                                                                         | ZNF215 BAZ2 ZKSCAN11                              | 517    |
| Q8IWB4 | S31A7_HUMAN | Spermatogenesis-associated protein 31A7 (Protein FAM75A7)                                                                                                                                                                                                                                                             | SPATA31A7 FAM75A4<br>FAM75A7 SPATA31A4            | 1347   |
| Q14207 | NPAT_HUMAN  | Protein NPAT (Nuclear protein of the ataxia telangiectasia mutated locus) (Nuclear protein of the ATM locus) (p220)                                                                                                                                                                                                   | NPAT CAND3 E14                                    | 1427   |
| P41225 | SOX3_HUMAN  | Transcription factor SOX-3                                                                                                                                                                                                                                                                                            | SOX3                                              | 446    |
| Q9P2F8 | SI1L2_HUMAN | Signal-induced proliferation-associated 1-like protein 2 (SIPA1-like protein 2)                                                                                                                                                                                                                                       | SIPA1L2 KIAA1389                                  | 1722   |
| Q5VUA4 | ZN318_HUMAN | Zinc finger protein 318 (Endocrine regulatory protein)                                                                                                                                                                                                                                                                | ZNF318 HRIHFB2436                                 | 2279   |
| P15822 | ZEP1_HUMAN  | Zinc finger protein 40 (Cirhin interaction protein) (CIRIP) (Gate keeper of apoptosis-activating protein) (GAAP) (Human immunodeficiency virus type I enhancer-binding protein 1) (HIV-EP1) (Major histocompatibility complex-binding protein 1) (MBP-1) (Positive regulatory domain II-binding factor 1) (PRDII-BF1) | HIVEP1 ZNF40                                      | 2718   |
| Q9P2D1 | CHD7_HUMAN  | Chromodomain-helicase-DNA-binding protein 7 (CHD-7) (EC 3.6.4.12) (ATP-dependent helicase CHD7)                                                                                                                                                                                                                       | CHD7 KIAA1416                                     | 2997   |
| P20810 | ICAL_HUMAN  | Calpastatin (Calpain inhibitor) (Sperm BS-17 component)                                                                                                                                                                                                                                                               | CAST                                              | 708    |
| O00570 | SOX1_HUMAN  | Transcription factor SOX-1                                                                                                                                                                                                                                                                                            | SOX1                                              | 391    |
| Q5TCZ1 | SPD2A_HUMAN | SH3 and PX domain-containing protein 2A (Adapter protein TKS5) (Five SH3 domain-containing protein) (SH3 multiple domains protein 1) (Tyrosine kinase substrate with five SH3 domains)                                                                                                                                | SH3PXD2A FISH<br>KIAA0418 SH3MD1 TKS5             | 1133   |
| P49750 | YLPM1_HUMAN | YLP motif-containing protein 1 (Nuclear protein ZAP3) (ZAP113)                                                                                                                                                                                                                                                        | YLPM1 C14orf170 ZAP3                              | 2146   |
| Q9UJU5 | FOXD3_HUMAN | Forkhead box protein D3 (HNF3/FH transcription factor genesis)                                                                                                                                                                                                                                                        | FOXD3 HFH2                                        | 478    |
| O96019 | ACL6A_HUMAN | Actin-like protein 6A (53 kDa BRG1-associated factor A) (Actin-related protein Baf53a) (ArpNbeta) (BRG1-associated factor 53A) (BAF53A) (INO80 complex subunit K)                                                                                                                                                     | ACTL6A BAF53 BAF53A<br>INO80K                     | 429    |
| Q96PV7 | F193B_HUMAN | Protein FAM193B                                                                                                                                                                                                                                                                                                       | FAM193B IRIZIO<br>KIAA1931                        | 902    |
| Q9NR48 | ASH1L_HUMAN | Histone-lysine N-methyltransferase ASH1L (EC 2.1.1.43) (ASH1-like protein) (huASH1) (Absent small and homeotic disks protein 1 homolog) (Lysine N-methyltransferase 2H)                                                                                                                                               | ASH1L KIAA1420 KMT2H                              | 2969   |
| P42684 | ABL2_HUMAN  | Tyrosine-protein kinase ABL2 (EC 2.7.10.2) (Abelson murine leukemia viral oncogene homolog 2) (Abelson tyrosine-protein kinase 2) (Abelson-related gene protein) (Tyrosine-protein kinase ARG)                                                                                                                        | ABL2 ABLL ARG                                     | 1182   |
| Q5JXC2 | MIIP_HUMAN  | Migration and invasion-inhibitory protein (IGFBP2-binding protein) (Invasion-inhibitory protein 45) (IIP45)                                                                                                                                                                                                           | MIIP IIP45                                        | 388    |
| Q8N7Z5 | ANR31_HUMAN | Ankyrin repeat domain-containing protein 31                                                                                                                                                                                                                                                                           | ANKRD31                                           | 1873   |
| Q86W56 | PARG_HUMAN  | Poly(ADP-ribose) glycohydrolase (EC 3.2.1.143)                                                                                                                                                                                                                                                                        | PARG                                              | 976    |
| Q684P5 | RPGP2_HUMAN | Rap1 GTPase-activating protein 2 (Rap1GAP2) (GTPase-activating Rap/Ran-GAP domain-like protein 4)                                                                                                                                                                                                                     | RAP1GAP2 GARNL4<br>KIAA1039 RAP1GA2               | 730    |
| P20929 | NEBU_HUMAN  | Nebulin                                                                                                                                                                                                                                                                                                               | NEB                                               | 6669   |
| P46087 | NOP2_HUMAN  | Probable 28S rRNA (cytosine(4447)-C(5))-methyltransferase (EC 2.1.1.-) (Nucleolar protein 1) (Nucleolar protein 2 homolog) (Proliferating-cell nucleolar antigen p120) (Proliferation-associated nucleolar protein p120)                                                                                              | NOP2 NOL1 NSUN1                                   | 812    |
| O95461 | LARG1_HUMAN | LARGE xylosyl- and glucuronyltransferase 1 (EC 2.4.-.-) (Acetylglucosaminyltransferase-like 1A) (Glycosyltransferase-like protein) [Includes: Xylosyltransferase LARGE (EC 2.4.2.-); Beta-1,3-glucuronyltransferase LARGE (EC 2.4.1.-)]                                                                               | LARGE1 KIAA0609 LARGE                             | 756    |



Table S4

| SNP          | coding sequence variant | Missense Variant  | Amino Acid Position | Polyphen                       | SIFT                    |
|--------------|-------------------------|-------------------|---------------------|--------------------------------|-------------------------|
| rs1419694769 | A>T                     | K (Lys) > E (Glu) | K132                | probably damaging, score 0.999 | deleterious, score 0    |
| rs1389486372 | C>T                     | P (Pro) > S (Ser) | P322                | benign, score 0.145            | deleterious, score 0.01 |
|              | C>A                     | P (Pro) > T (Thr) |                     | benign, score 0.021            | tolerated, score 0.25   |
| rs1178459411 | C>A                     | P (Pro) > T (Thr) | P326                | possibly damaging, score 0.813 | deleterious, score 0.02 |
| rs1294049725 | C>A                     | P (Pro) > Q (Gln) |                     | probably damaging, score 0.953 | tolerated, score 0.08   |
| rs1161821962 | C>T                     | A (Ala) > V (Val) | A328                | benign, score 0                | tolerated, score 0.46   |
| rs1382937308 | C>T                     | P (Pro) > L (Leu) | P329                | benign, score 0                | tolerated, score 0.29   |
| rs1362549824 | C>T                     | P (Pro) > S (Ser) |                     | benign, score 0                | tolerated, score 1      |

Table S5

| <b>Validation server</b>                                                               | <b>HMG domain</b> | <b>SOXp domain</b> | <b>C-terminal domain</b> |
|----------------------------------------------------------------------------------------|-------------------|--------------------|--------------------------|
| <b>ProSA Web</b>                                                                       | -4.01             | -2.84              | -1.26                    |
| <b>Verify 3D<br/>(Residues with an averaged 3D-1D<br/>score <math>\geq 0.2</math>)</b> | 94.32%            | 90.91%             | 71.15%                   |
| <b>Rampage<br/>(Residues in favoured/allowed<br/>regions)</b>                          | 100%              | 100%               | 100%                     |
